# Supplementary material for: Wetlands are keystone habitats for jaguars in an intercontinental biodiversity hotspot
Source: PLoS One. 2019 Sep 11;14(9):e0221705. doi: 10.1371/journal.pone.0221705 (PMC6738587; doi:10.1371/journal.pone.0221705)
Supplement: S1 Table — (XLSX) [file pone.0221705.s003.xlsx]

## Sheet: Sheet1
Depart.	Jag detect	Camera	2015-08-01	2015-09-01	2015-10-01	2015-11-01	2015-12-01	2016-01-01	2016-02-01	2016-03-01	2016-04-01
Antioquia	1	WCS_1	0	1	0	0	-	-	-	-	-
Antioquia	1	JDSL_2	1	0	0	1	-	-	-	-	-
Antioquia	1	JDSL_3	0	0	1	1	-	-	-	-	-
Antioquia	0	JDSL_4	0	0	0	-	-	-	-	-	-
Antioquia	0	WCS_5	0	0	0	0	-	-	-	-	-
Antioquia	1	JDSL_6	0	1	0	-	-	-	-	-	-
Antioquia	1	WCS_7	0	0	1	0	0	-	-	-	-
Antioquia	0	WCS_8	0	0	0	0	-	-	-	-	-
Antioquia	0	WCS_9	0	0	0	0	0	-	-	-	-
Antioquia	0	WCS_10	0	0	0	0	0	-	-	-	-
Antioquia	1	WCS_11	0	0	1	0	0	-	-	-	-
Antioquia	1	JDSL_12	0	1	0	-	-	-	-	-	-
Antioquia	0	JDSL_13	0	0	0	0	-	-	-	-	-
Antioquia	1	WCS_14	0	0	1	0	0	-	-	-	-
Santander	1	WCS_15	0	0	0	1	0	-	-	-	-
Santander	0	WCS_16	0	0	0	-	-	-	-	-	-
Santander	0	WCS_17	0	0	0	0	0	-	-	-	-
Santander	0	WCS_18	0	0	0	0	0	-	-	-	-
Santander	0	WCS_19	0	0	0	0	0	-	-	-	-
Santander	0	WCS_20	0	0	0	0	0	-	-	-	-
Santander	0	WCS_21	0	0	0	0	0	-	-	-	-
Santander	1	JJF_22	1	0	0	1	1	0	0	0	0
Santander	1	JJF_23	1	0	0	0	0	0	0	0	0
Santander	1	JJF_24	1	0	0	1	0	0	0	0	0
Santander	0	JJF_25	0	0	0	0	0	0	0	0	0
Santander	0	JJF_26	0	0	0	0	0	0	0	0	0
Santander	0	JJF_27	0	0	0	0	0	0	0	0	0
Santander	0	JJF_28	0	0	0	0	0	0	0	0	0
Bolivar	1	JJF_29	1	0	0	0	0	1	0	0	1
Bolivar	1	JJF_30	1	0	0	0	0	0	1	0	1
Santander	1	JJF_31	0	0	1	0	0	0	0	1	0
Santander	1	JJF_32	0	0	0	1	0	0	0	0	0
Santander	0	JJF_33	0	0	0	0	0	0	0	0	0
Santander	0	JJF_34	0	0	0	0	0	0	0	0	0
Santander	0	JJF_35	0	0	0	0	0	0	0	0	0
Santander	0	JJF_36	0	0	0	0	0	0	0	0	0
Santander	0	JJF_37	0	0	0	0	0	0	0	0	0
Santander	0	JJF_38	0	0	0	0	0	0	0	0	0
Santander	0	JJF_39	0	0	0	0	0	0	0	0	0
Santander	0	JJF_40	0	0	0	0	0	0	0	0	0
Santander	0	JJF_41	0	0	0	0	0	0	0	0	0
Santander	0	JJF_42	0	0	0	0	0	0	0	0	0
Santander	0	JJF_43	0	0	0	0	0	0	0	0	0
Santander	0	JJF_44	0	0	0	0	0	0	0	0	0
Santander	0	JJF_45	0	0	0	0	0	0	0	0	0
Santander	0	JJF_46	0	0	0	0	0	0	0	0	0
Santander	0	JJF_47	0	0	0	0	0	0	0	0	0
Santander	0	JJF_48	0	0	0	0	0	0	0	0	0
Santander	0	JJF_49	0	0	0	0	0	0	0	0	0
Santander	1	JJF_50	0	0	1	0	0	1	1	0	0
Santander	1	JJF_51	0	0	0	1	0	0	1	1	0
Santander	0	JJF_52	0	0	0	0	0	0	0	0	0
Santander	1	JJF_53	1	0	0	0	0	0	0	1	0
Santander	0	JJF_54	0	0	0	0	0	0	0	0	0
Santander	0	JJF_55	0	0	0	0	0	0	0	0	0
Santander	0	JJF_56	0	0	0	0	0	0	0	0	0
Bolivar	0	JJF_57	0	0	0	0	0	0	0	0	0
Bolivar	0	JJF_58	0	0	0	0	0	0	0	0	0
Bolivar	0	JJF_59	0	0	0	0	0	0	0	0	0
Santander	0	JJF_60	0	0	0	0	0	0	0	0	0
Santander	0	JJF_61	0	0	0	0	0	0	0	0	0
Bolivar	0	JJF_62	0	0	0	0	0	0	0	0	0
Bolivar	1	JJF_63	1	1	0	0	0	0	0	0	1
Santander	1	JJF_64	0	0	0	0	0	0	0	1	0
Santander	0	JJF_65	0	0	0	0	0	0	0	0	0
Santander	0	JJF_66	0	0	0	0	0	0	0	0	0
Santander	1	JJF_67	0	0	1	0	1	0	0	0	0
Santander	1	JJF_68	0	0	1	0	0	0	1	0	1
Santander	0	JJF_69	0	0	0	0	0	0	0	0	0
Santander	0	WCS_70	0	0	0	0	0	-	-	-	-
