# Supplementary material for: Wetlands are keystone habitats for jaguars in an intercontinental biodiversity hotspot
Source: PLoS One. 2019 Sep 11;14(9):e0221705. doi: 10.1371/journal.pone.0221705 (PMC6738587; doi:10.1371/journal.pone.0221705)
Supplement: S2 Table — (XLSX) [file pone.0221705.s004.xlsx]

## Sheet: Sheet1
Country	Site name	Coord	Site no.	Area (ha)	Date established
Colombia	Delta del Río Baudó	04°53'N 77°22'W	1387	8888	2004-06-05
Ecuador	Reserva Ecológica de Manglares Cayapas-Mataje	01°16'N 79°00'W	1292	44847	2003-06-12
Ecuador	Laguna de Cube	00°24'N 79°39'W	1143	113	2002-02-02
Ecuador	La Segua	00°42'N 80°12'W	1028	1836	2000-06-07
Ecuador	Zona Marina Parque Nacional Machalilla	01°00'S 80°45'W	503	14430	1990-09-07
Ecuador	Isla Santay	02°13'S 79°51'W	1041	4705	2000-10-31
Ecuador	Manglares del Estuario Interior del Golfo de Guayaquil “Don Goyo”	02°24'S 79°56'W	2098	15338	2012-12-15
Ecuador	Manglares Churute	02°28'S 79°42'W	502	35042	1990-09-07
Ecuador	La Tembladera	03°30'S 78°00'W	1991	1471	2011-12-06
Peru	Santuario Nacional Los Manglares de Tumbes	03°25'S 80°17'W	883	2972	1997-01-20
Peru	Manglares de San Pedro de Vice	05°31'S 80°53'W	1811	3399	2008-06-12
				133041
